# Supplementary material for: ArduiTaM: accurate and inexpensive NMR auto tune and match system
Source: Copernicus journal article supplement (doi:10.5194/mr-1-105-2020), 2020-06-29
Supplement: Supplementary file [file mr-1-105-2020-supplement.pdf]

Supplement of Magn. Reson., 1, 105–113, 2020  
<https://doi.org/10.5194/mr-1-105-2020-supplement>  
© Author(s) 2020. This work is distributed under  
the Creative Commons Attribution 4.0 License.

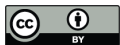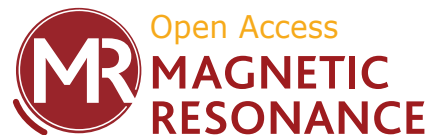

*Supplement of*

## **ArduiTaM: accurate and inexpensive NMR auto tune and match system**

**Mazin Jouda et al.**

*Correspondence to:* Jan G. Korvink ([korvink@kit.edu](mailto:korvink@kit.edu))

The copyright of individual parts of the supplement might differ from the CC BY 4.0 License.

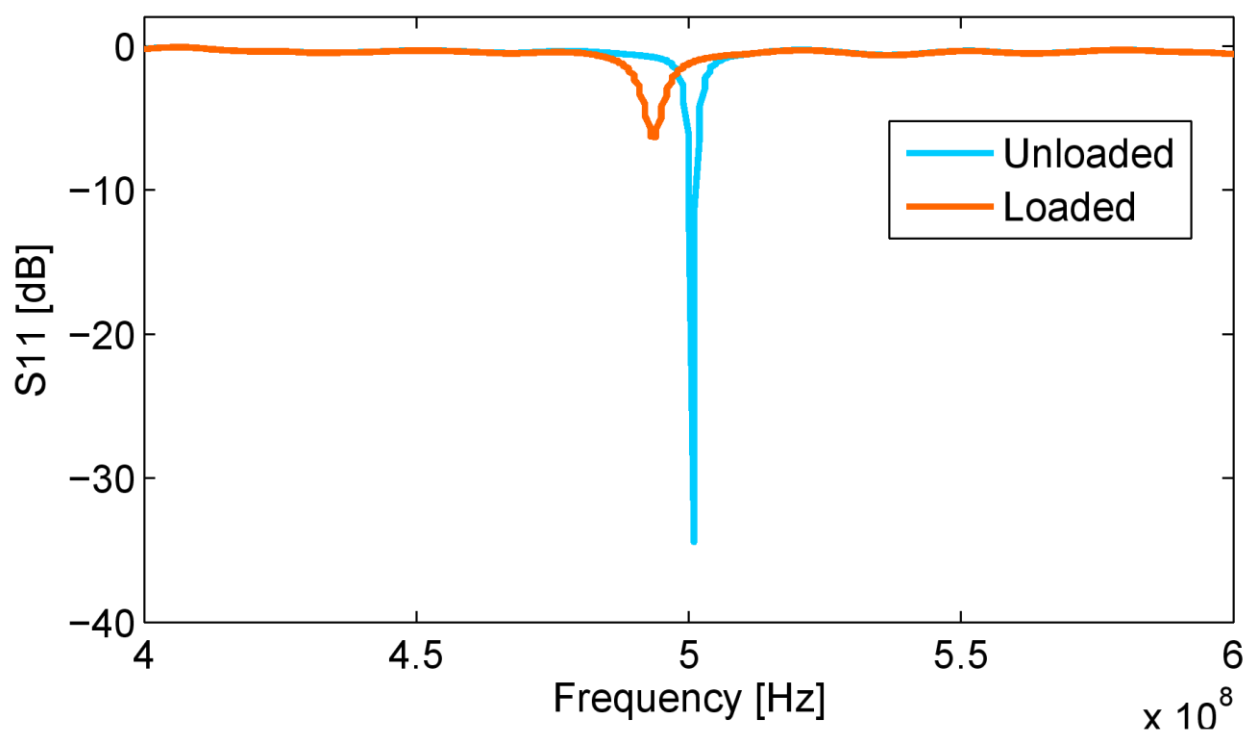

Fig. S1: Effect of sample loading on the tuning and matching conditions. The coil is a commercial 5mm saddle coil designed to operate in a 11.7 T Bruker magnet at 500 MHz. Loading the sample (0.5 M NaPO<sub>3</sub>, 0.5 M Phosphoric Buffer Solution (PBS), 50 mM TSP, 0.5 M Sucrose) disturbs the tuning and matching condition largely (6 MHz frequency shift, 28 dB change in S11).

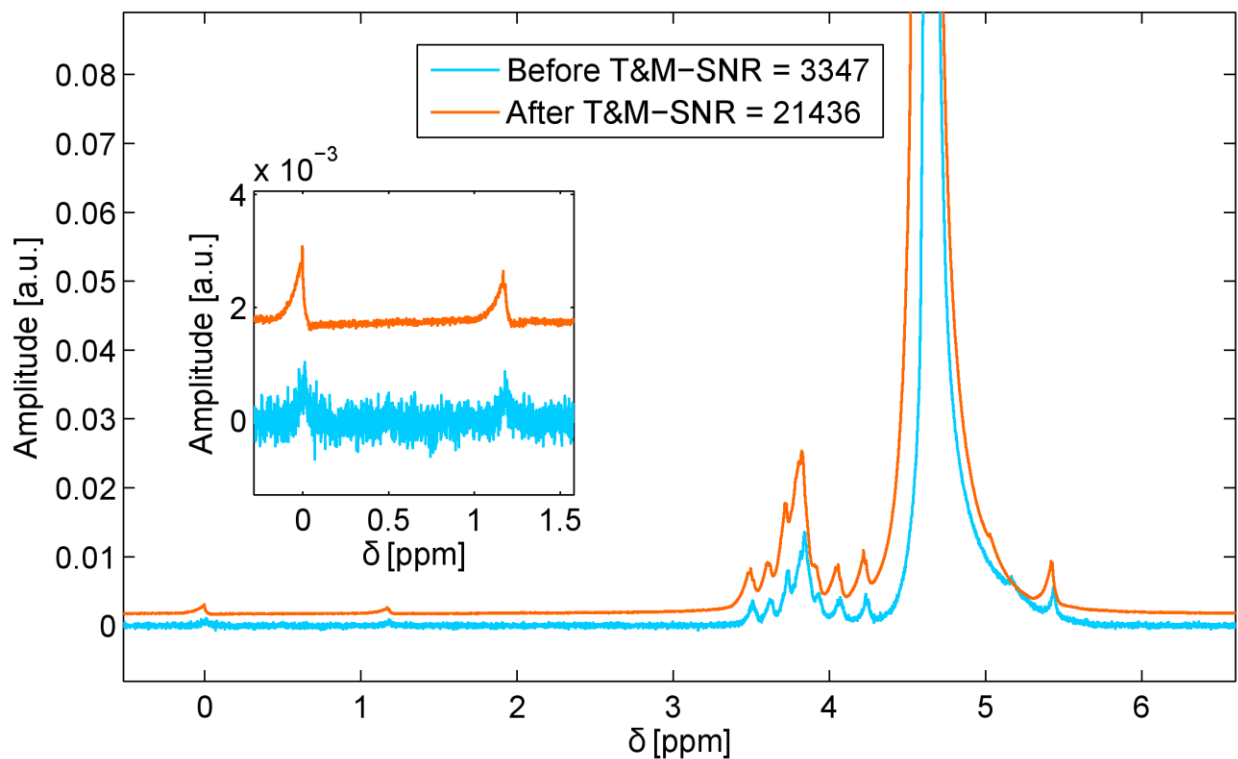

Fig. S2: Effect of tuning and matching on the quality of the NMR spectrum. The coil is a commercial 5 mm saddle coil designed to operate in a 11.7 T Bruker magnet at 500 MHz. The sample is 0.5 M NaPO<sub>3</sub>, 0.5 M Phosphoric Buffer Solution (PBS), 50 mM TSP, 0.5 M Sucrose. Readjusting the tuning and matching condition after loading the sample enhanced the SNR significantly (a factor of 6.4).

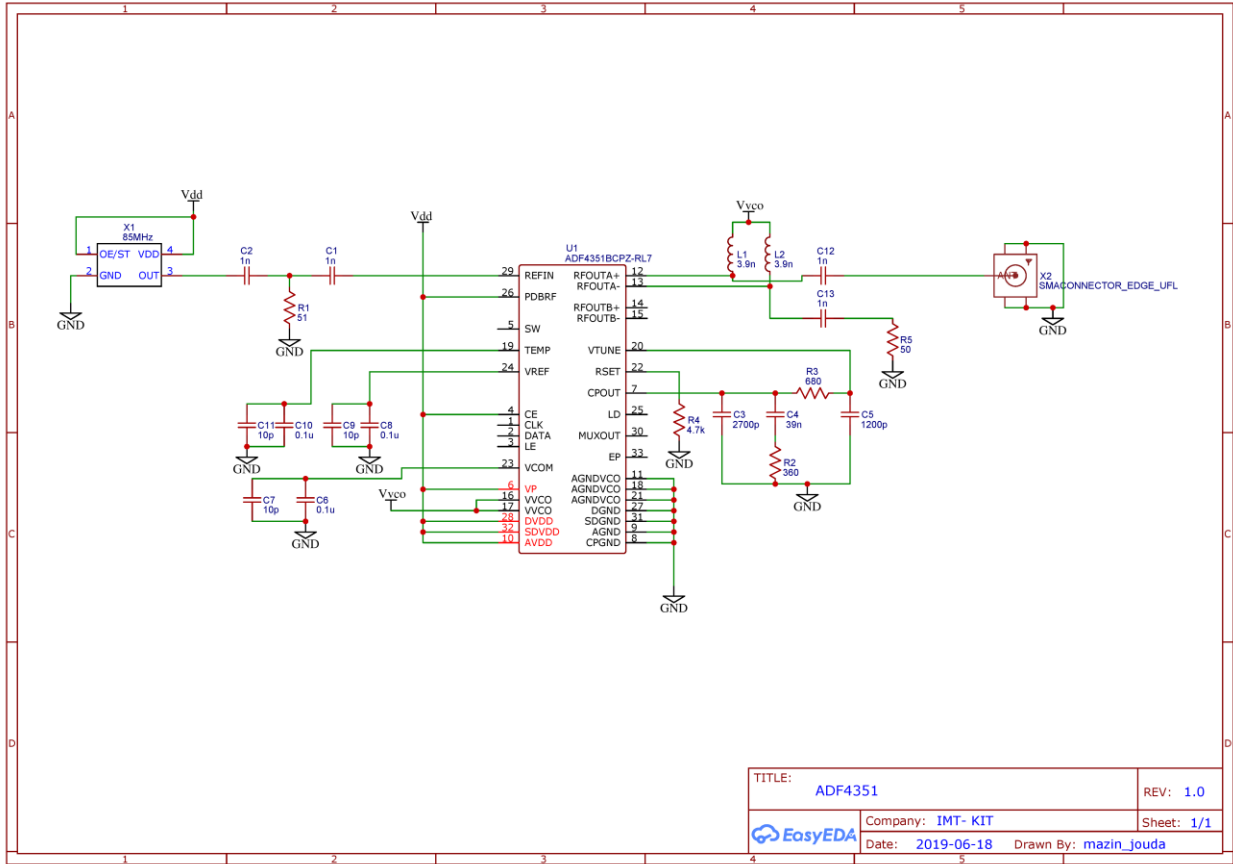

Fig. S3: Schematic diagram of the ADF4351 broadband frequency synthesizer.

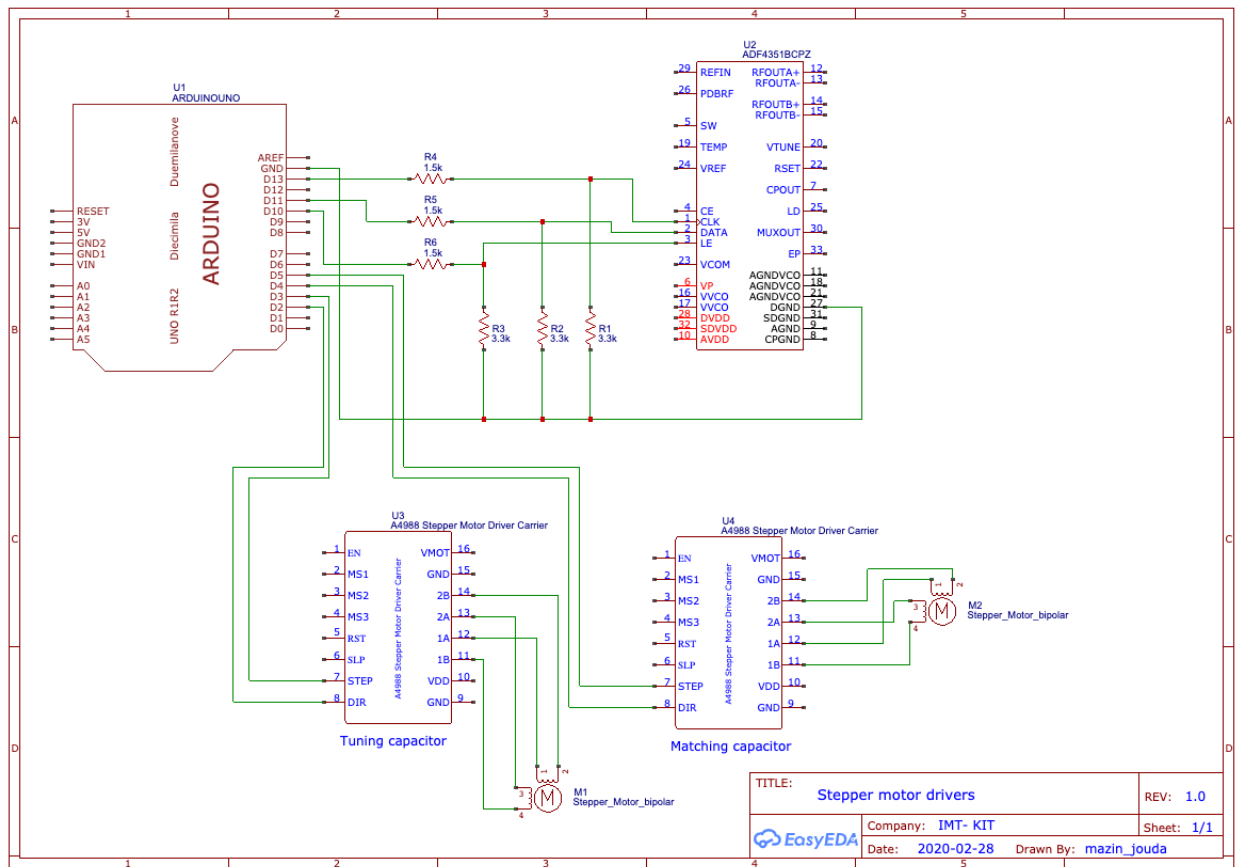

Fig. S4: Circuit diagram describing the interface between the Arduino and the ADF4351 frequency synthesizer. The diagram shows also the connections of the stepper motors' drivers (A4988).

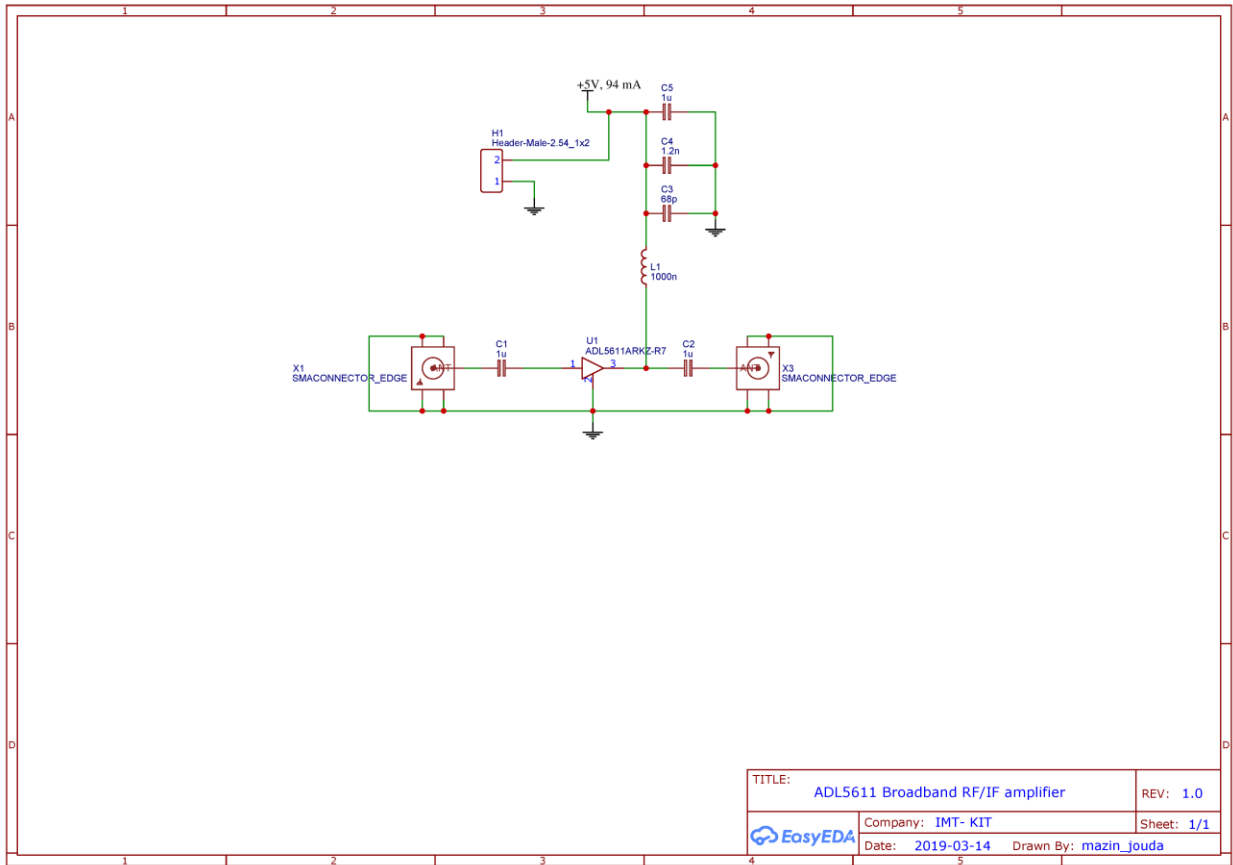

Fig. S5: Circuit diagram of the ADL5611 broadband IF/RF amplifier.

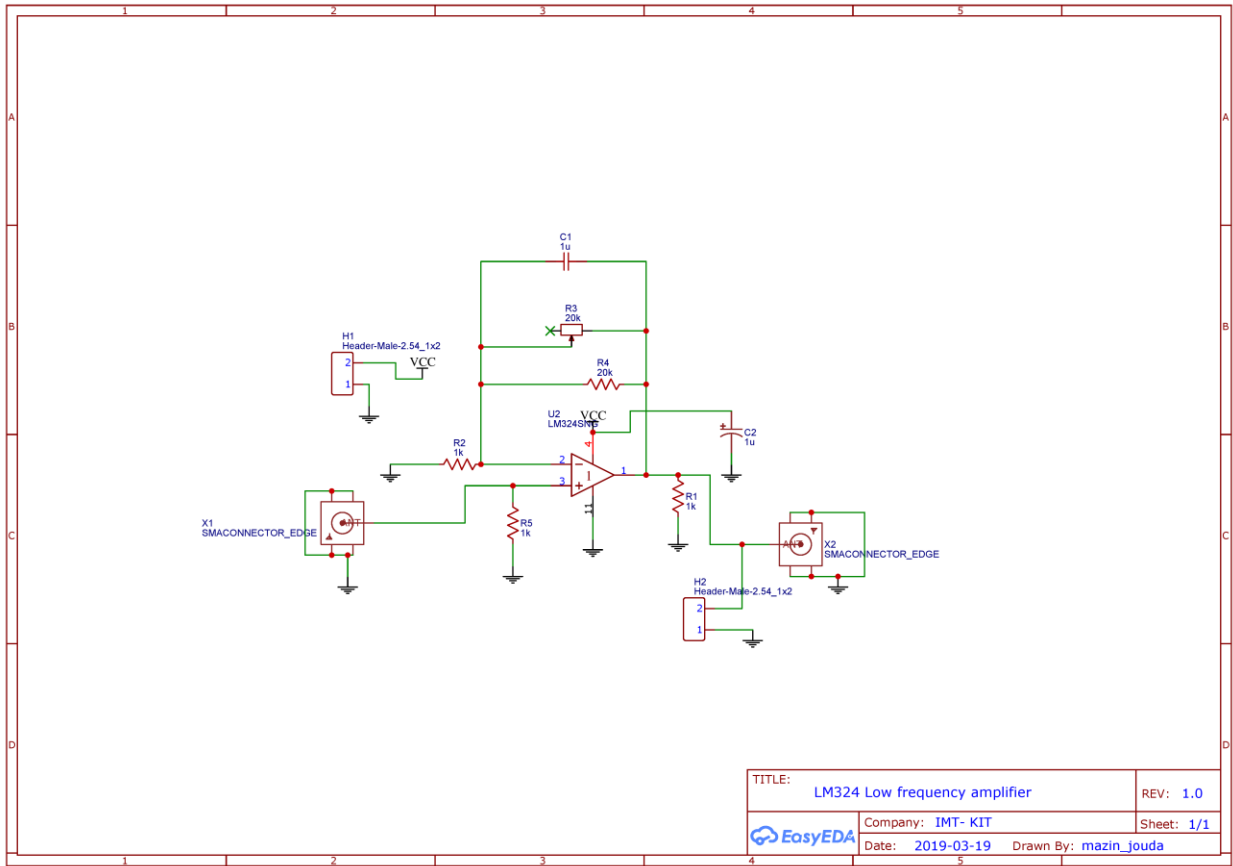

Fig. S6: Schematic of the LM324 low-frequency amplifier.
